# Supplementary material
Source: PubMed Central journal article supplement (PMC3454877)
Supplement: 1b5b8d7cd61cac6c15d12573464d2645_genetics.112.142612-6.pdf [file 1b5b8d7cd61cac6c15d12573464d2645_genetics.112.142612-6.pdf]

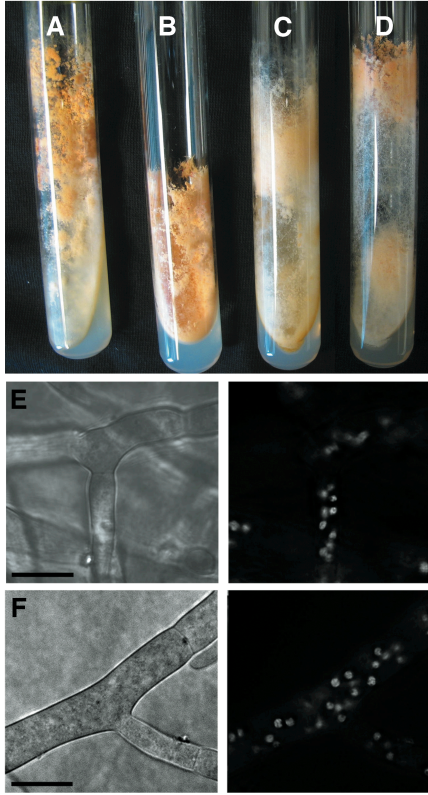

**Figure S1** Phenotype of *vib-1* phosphorylation site mutants. (A) wild type (FGSC 2489), (B)  $\Delta vib-1$  (FGSC 11309), (C) transformant with *vib-1*<sup>S60A</sup>-*gfp* mutant allele (strain 1XA) and (D) transformant with *vib-1*<sup>S60D</sup>-*gfp* mutant allele (strain 1XD). Strains expressing VIB-1<sup>S60A</sup>-GFP (E) and VIB-1<sup>S60D</sup>-GFP (F) exhibit normal nuclear localization (shown in panels at right). Brightfield images of hyphae are shown in corresponding panels to the left.
