# Supplementary material
Source: PubMed Central journal article supplement (PMC3454877)
Supplement: 8be849d97b3e2f75563b410e4ae7ce27_genetics.112.142612-3.pdf [file 8be849d97b3e2f75563b410e4ae7ce27_genetics.112.142612-3.pdf]

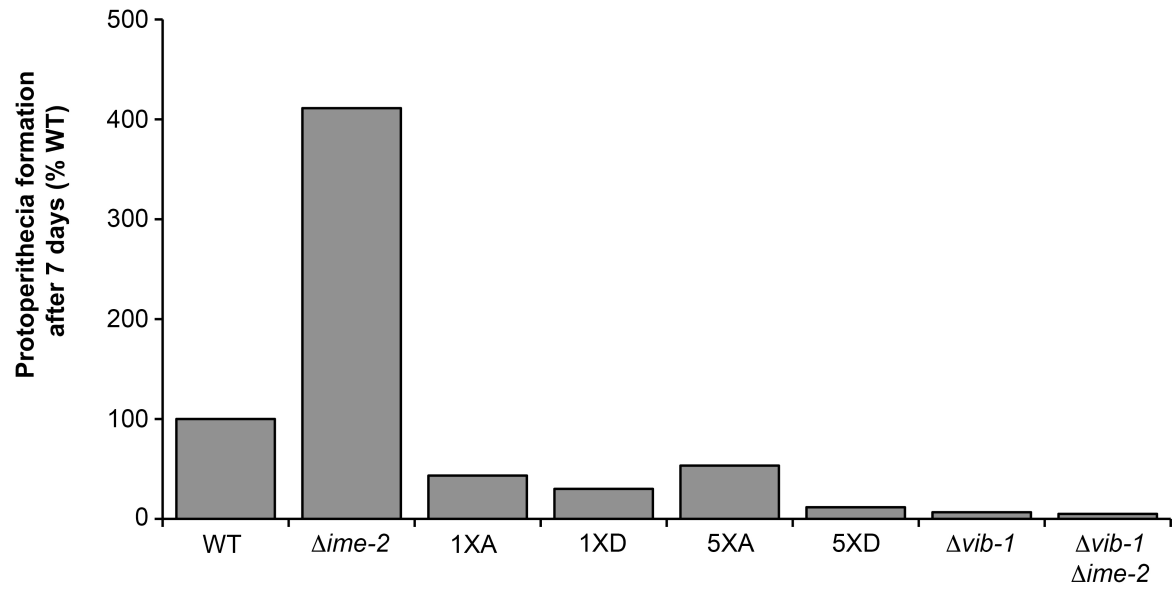

**Figure S3** Formation of *N. crassa* protoperithecia after 7 days of growth on water agar. Numbers of protoperithecia for each strain are shown as a percentage of wild type. Strains used are listed in table 1 and are as follows: WT (FGSC 2489),  $\Delta vib-1$  (FGSC 11309),  $\Delta ime-2$  (FGSC 17937),  $\Delta vib-1 \Delta ime-2$  (DVI.4).
