# Supplementary material
Source: PubMed Central journal article supplement (PMC3454877)
Supplement: 32d2f330a997bdff3ec5ef9c8b3051f1_genetics.112.142612-4.pdf [file 32d2f330a997bdff3ec5ef9c8b3051f1_genetics.112.142612-4.pdf]

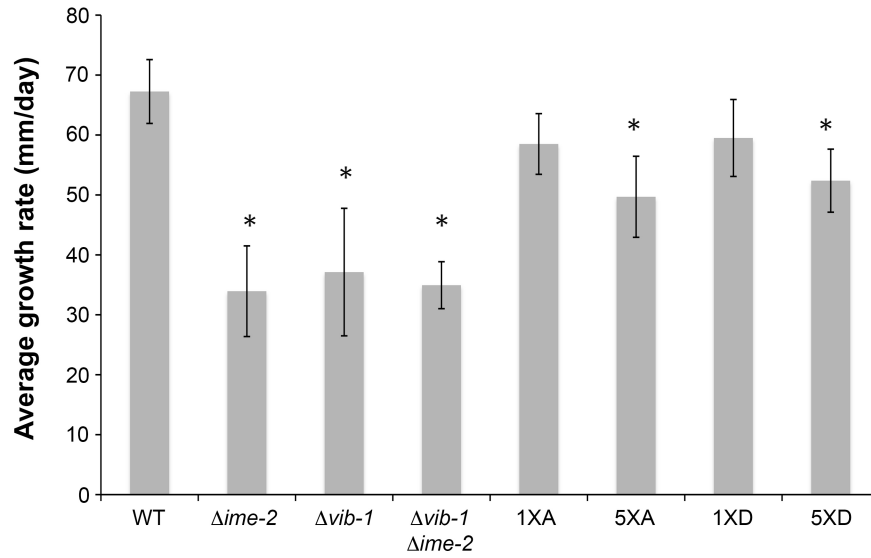

**Figure S2** Average growth rate (mm/day) of strains grown on minimal media in race tubes. Asterisks (\*) indicate strains with growth rates significantly different ( $p < 0.05$ ) than the WT strain. Strains used are listed in table 1 and are as follows: WT (FGSC 2489),  $\Delta vib-1$  (FGSC 11309),  $\Delta ime-2$  (FGSC 17937),  $\Delta vib-1 \Delta ime-2$  (DVI.4).
