# Supplementary material
Source: PubMed Central journal article supplement (PMC3454877)
Supplement: 5910721ad390eb65efa92df86815bd24_genetics.112.142612-2.pdf [file 5910721ad390eb65efa92df86815bd24_genetics.112.142612-2.pdf]

**Table S1 Mitochondrial genes**

| Gene      | Annotation <sup>a</sup>            | Decreased expression levels in $\Delta ime-2$ |
|-----------|------------------------------------|-----------------------------------------------|
| NCU_16001 | NADH dehydrogenase subunit 2       |                                               |
| NCU_16002 | conserved hypothetical             | yes                                           |
| NCU_16003 | cytochrome c oxidase subunit 3     | yes                                           |
| NCU_16004 | NADH dehydrogenase subunit 6       |                                               |
| NCU_16005 | mitochondrial ribosomal protein S5 | yes                                           |
| NCU_16006 | NADH dehydrogenase subunit 2       |                                               |
| NCU_16007 | NADH dehydrogenase subunit 3       | yes                                           |
| NCU_16008 | NADH dehydrogenase subunit 4L      | yes                                           |
| NCU_16009 | hypothetical protein               |                                               |
| NCU_16010 | laglidadg endonuclease             |                                               |
| NCU_16011 | hypothetical protein               |                                               |
| NCU_16012 | NADH dehydrogenase subunit 5       |                                               |
| NCU_16013 | cytochrome b                       |                                               |
| NCU_16014 | group I intron endonuclease        | yes                                           |
| NCU_16015 | laglidadg endonuclease             | yes                                           |
| NCU_16016 | cytochrome c oxidase subunit 1     | yes                                           |
| NCU_16017 | hypothetical protein               | yes                                           |
| NCU_16018 | NADH dehydrogenase subunit 1       | yes                                           |
| NCU_16019 | group I intron endonuclease        |                                               |
| NCU_16020 | NADH dehydrogenase subunit 4       | yes                                           |
| NCU_16021 | laglidadg endonuclease             |                                               |
| NCU_16022 | hypothetical protein               |                                               |
| NCU_16023 | hypothetical protein               |                                               |
| NCU_16024 | ATPase subunit 8                   | yes                                           |
| NCU_16025 | ATPase subunit 6                   |                                               |
| NCU_16026 | laglidadg endonuclease             |                                               |
| NCU_16027 | ATPase subunit 9                   | yes                                           |
| NCU_16028 | cytochrome c oxidase subunit 2     |                                               |

<sup>a</sup>Broad Institute
