# Supplementary material
Source: PubMed Central journal article supplement (PMC3454877)
Supplement: 14859150a9d197c2ff035515d6d1ce33_genetics.112.142612-5.pdf [file 14859150a9d197c2ff035515d6d1ce33_genetics.112.142612-5.pdf]

**Table S2 Potential *N. crassa* IME-2 targets for phosphorylation, predicted by Scansite<sup>a, b</sup>**

| NCU #    | Annotation                                                                    |
|----------|-------------------------------------------------------------------------------|
| NCU00101 | PBN-1                                                                         |
| NCU00258 | 40S ribosomal protein S7                                                      |
| NCU00269 | Histone-lysine N-methyltransferase, H3 lysine-36 specific                     |
| NCU00276 | DNA polymerase gamma, mitochondrial                                           |
| NCU00311 | Protein VTS1                                                                  |
| NCU00552 | Phytoene dehydrogenase; albino 1 protein                                      |
| NCU00675 | Protein EFR-3                                                                 |
| NCU01157 | Glutamate-cysteine ligase                                                     |
| NCU01206 | Histone-lysine N-methyltransferase, H3 lysine-4 specific                      |
| NCU01312 | Myb-like DNA-binding protein MYB-1                                            |
| NCU01797 | Serine/threonine-protein kinase NRC-2 (Non-repressible conidiation protein 2) |
| NCU01954 | Pre-mRNA-splicing factor CWC-24                                               |
| NCU02466 | SVP1-like protein 2                                                           |
| NCU03678 | Protein SSH-4                                                                 |
| NCU03725 | Transcription factor VIB-1                                                    |
| NCU03819 | COPII coat assembly protein SEC-16                                            |
| NCU03894 | Serine/threonine-protein kinase STE-20                                        |
| NCU04190 | Probable exocyst complex component SEC-8                                      |
| NCU04191 | Protein RAI-1                                                                 |
| NCU05589 | Protein SIP-5                                                                 |
| NCU05876 | pH-response regulator protein PAL-A/RIM-20                                    |
| NCU06276 | Increased rDNA silencing protein 4                                            |
| NCU06498 | Pre-mRNA-splicing factor CWC-21                                               |
| NCU07693 | Protein STU-1                                                                 |
| NCU07863 | Chromatin modification-related protein VID-21                                 |
| NCU08566 | Nuclear distribution protein nudE homolog 1 (RO-11)                           |
| NCU08699 | Putative oxidoreductase BLI-4, mitochondrial                                  |
| NCU09068 | Nitrogen catabolic enzyme regulatory protein                                  |
| NCU09730 | Kinesin heavy chain                                                           |
| NCU09993 | Helicase SWR-1                                                                |

<sup>a</sup> <http://scansite.mit.edu/>; <sup>b</sup> one mismatch was allowed at the final consensus position
